# Supplementary material for: MET Mutation Is a Potential Therapeutic Target for Advanced Endometrial Cancer
Source: MDPI journal article supplement (doi:10.3390/cancers13164231), 2021-08-23
Supplement: s1 [file s1]

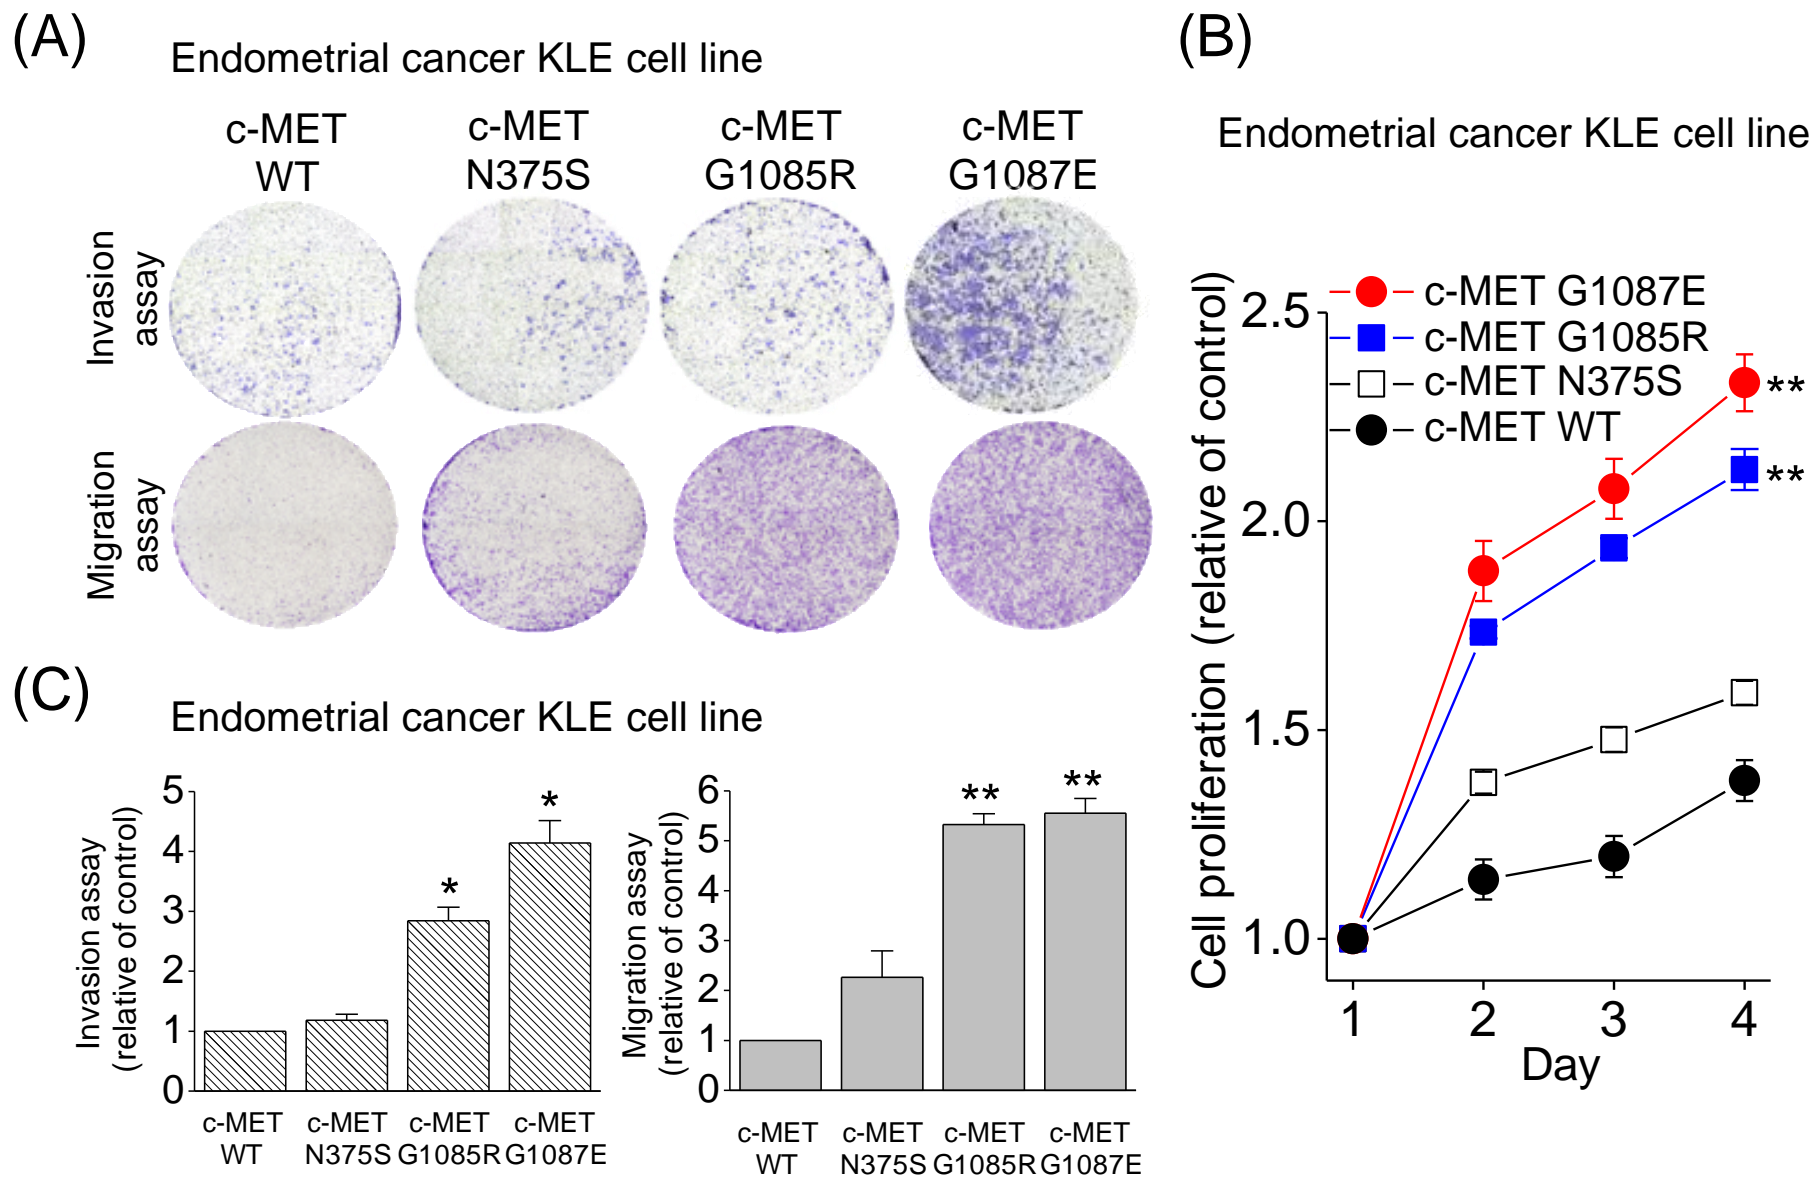

**Supplementary Figure S4. Effect of *MET* mutations on the cellular function of endometrial cancer KLE cell line. (A) & (B)** A representative image and quantitative analysis of invasion and migration assay on various clones of *MET* mutation. **(C)** Proliferation assay. Each value represents mean  $\pm$  SEM from at least 3 different samples. \* $P < 0.05$ ; \*\* $P < 0.01$ .
