# Supplementary material for: MET Mutation Is a Potential Therapeutic Target for Advanced Endometrial Cancer
Source: MDPI journal article supplement (doi:10.3390/cancers13164231), 2021-08-23
Supplement: s1 [file s1]

**(A)**

|                      | c-MET exon         | Protein domain        | c-MET mutation | Tumor tissue |
|----------------------|--------------------|-----------------------|----------------|--------------|
| Extracellular domain | Exon 2<br>(58.1%)  | Sema domain           | A82V (N = 2)   | P/M          |
|                      |                    |                       | E91K (N = 1)   | P            |
|                      |                    |                       | P97S (N = 1)   | M            |
|                      |                    |                       | D100N (N = 1)  | M            |
|                      |                    |                       | Q142fs (N = 1) | P            |
|                      |                    |                       | D270N (N = 1)  | M            |
|                      |                    |                       | M292I (N = 1)  | M            |
|                      |                    |                       | P351L (N = 1)  | M            |
|                      |                    |                       | N375S (N = 24) | P/M          |
|                      |                    |                       | N381fs (N = 2) | M            |
|                      |                    |                       | Y390fs (N = 1) | M            |
| Intracellular domain | Exon 10<br>(1.6%)  | IPT domain            | R784K (N = 1)  | M            |
|                      | Exon 11<br>(14.5%) | IPT domain            | C800Y (N = 1)  | P            |
|                      |                    |                       | S805F (N = 2)  | P/M          |
|                      |                    |                       | Q808* (N = 2)  | P            |
|                      |                    |                       | A819V (N = 1)  | P            |
|                      |                    |                       | G825R (N = 1)  | P            |
|                      |                    |                       | L827F (N = 1)  | M            |
|                      |                    |                       | L833F (N = 1)  | P            |
|                      | Exon 14<br>(9.6%)  | Juxta-membrane domain | V969I (N = 1)  | P            |
|                      |                    |                       | R970C (N = 1)  | M            |
|                      |                    |                       | D972N (N = 1)  | P            |
|                      |                    |                       | A973V (N = 1)  | M            |
|                      |                    |                       | S988N (N = 1)  | P            |
|                      | Exon 15<br>(8.1%)  | Kinase domain         | T993A (N = 1)  | P            |
|                      |                    |                       | H1079Y (N = 1) | P            |
|                      |                    |                       | E1082K (N = 1) | M            |
|                      |                    |                       | G1085R (N = 1) | M            |
|                      |                    |                       | G1085E (N = 1) | M            |
|                      | Exon 16<br>(8.1%)  | Kinase domain         | R1086K (N = 1) | P            |
|                      |                    |                       | G1087E (N = 1) | M            |
|                      |                    |                       | H1088Y (N = 1) | P            |
|                      |                    |                       | H1094Y (N = 1) | M            |
|                      |                    |                       | T1096I (N = 1) | P            |
|                      |                    |                       | C1107Y (N = 1) | M            |

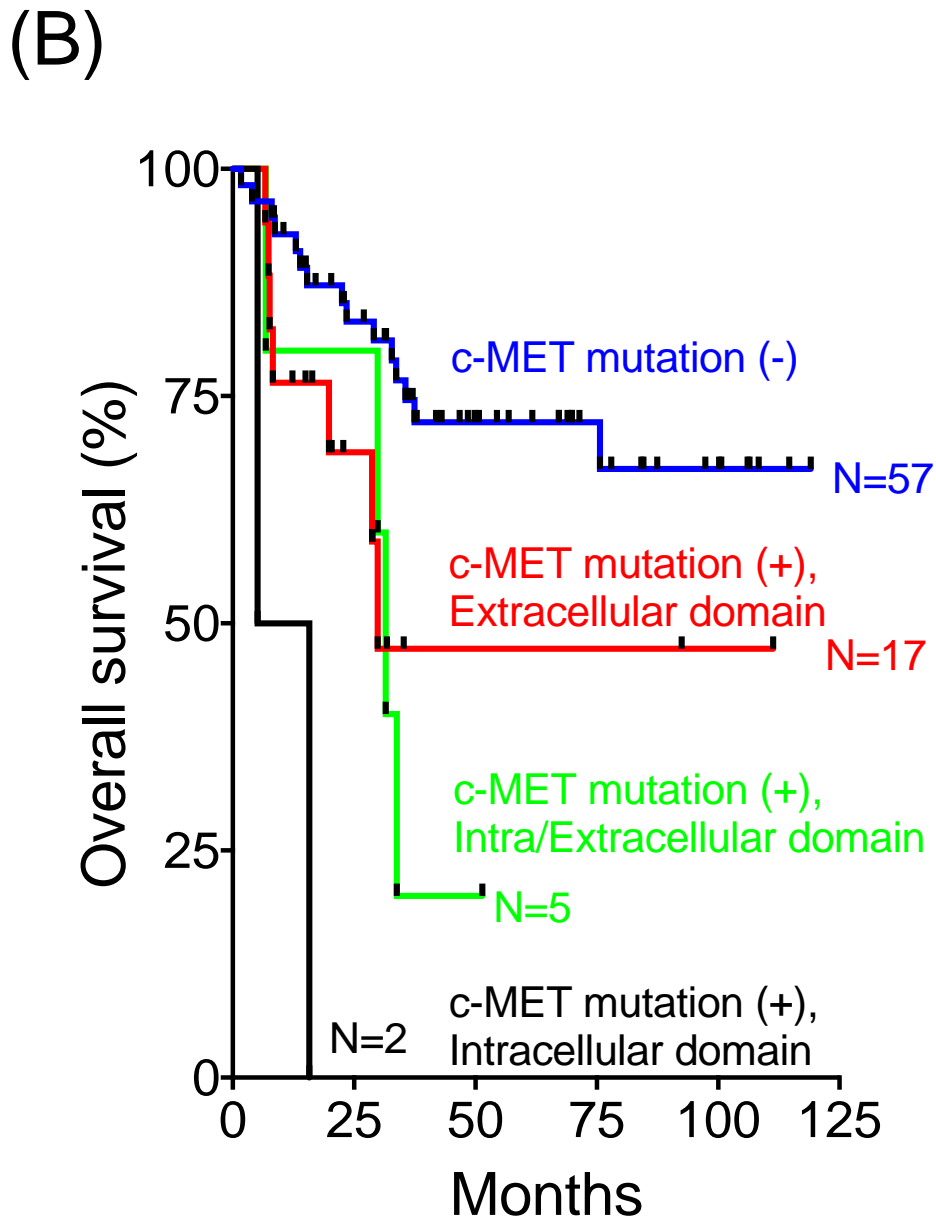

**Supplementary Figure S2. *MET* mutational patterns and overall survival.** **(A)** All variants of *MET* mutations were analyzed from 112 surgical samples of advanced endometrial cancer, including 81 primary tumors (P) and 31 metastatic tissues (M). **(B)** The relationship between *MET* mutational patterns and overall survival.
