# Supplementary material for: MET Mutation Is a Potential Therapeutic Target for Advanced Endometrial Cancer
Source: MDPI journal article supplement (doi:10.3390/cancers13164231), 2021-08-23
Supplement: s1 [file s1]

(A)

| Case | POLE mutation     |                  |                    |                    |                    |                    | Stage | Grade | Histology   |
|------|-------------------|------------------|--------------------|--------------------|--------------------|--------------------|-------|-------|-------------|
|      | Exon 9<br>c.C857G | Exon9<br>c.C890T | Exon13<br>c.G1231T | Exon13<br>c.G1366C | Exon14<br>c.C1376T | Exon14<br>c.C1394T |       |       |             |
| 1    |                   | X                |                    |                    |                    | X                  | 4     | 3     | Endometroid |
| 2    |                   | X                |                    |                    |                    | X                  | 4     | 2     | Endometroid |
| 3    |                   | X                |                    |                    |                    |                    | 3     | 3     | Endometroid |
| 4    |                   |                  |                    | X                  |                    |                    | 3     | 3     | Endometroid |
| 5    | X                 |                  |                    |                    |                    |                    | 3     | 3     | Endometroid |
| 6    | X                 |                  |                    |                    |                    |                    | 3     | 2     | Endometroid |
| 7    |                   |                  | X                  |                    | X                  |                    | 4     | 3     | Endometroid |
| 8    |                   |                  |                    |                    | X                  |                    | 3     | 1     | Endometroid |
| 9    |                   |                  |                    |                    | X                  |                    | 4     | 3     | Endometroid |

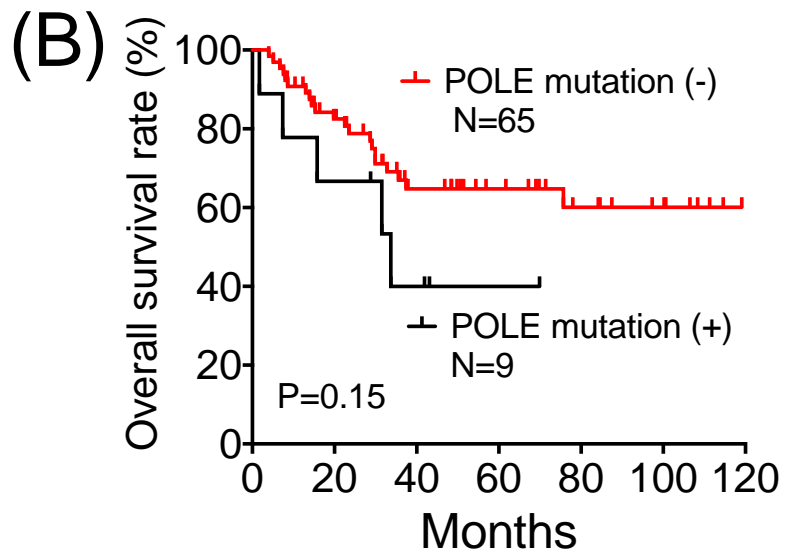

**Supplementary Figure S7. DNA polymerase epsilon (POLE) mutations in advanced endometrial cancer. (A)** Mutation patterns of POLE in NCKUH cohort. **(B)** Overall survival in the presence or absence of POLE mutation in NCKUH cohort.
