# Supplementary material for: MET Mutation Is a Potential Therapeutic Target for Advanced Endometrial Cancer
Source: MDPI journal article supplement (doi:10.3390/cancers13164231), 2021-08-23
Supplement: s1 [file s1]

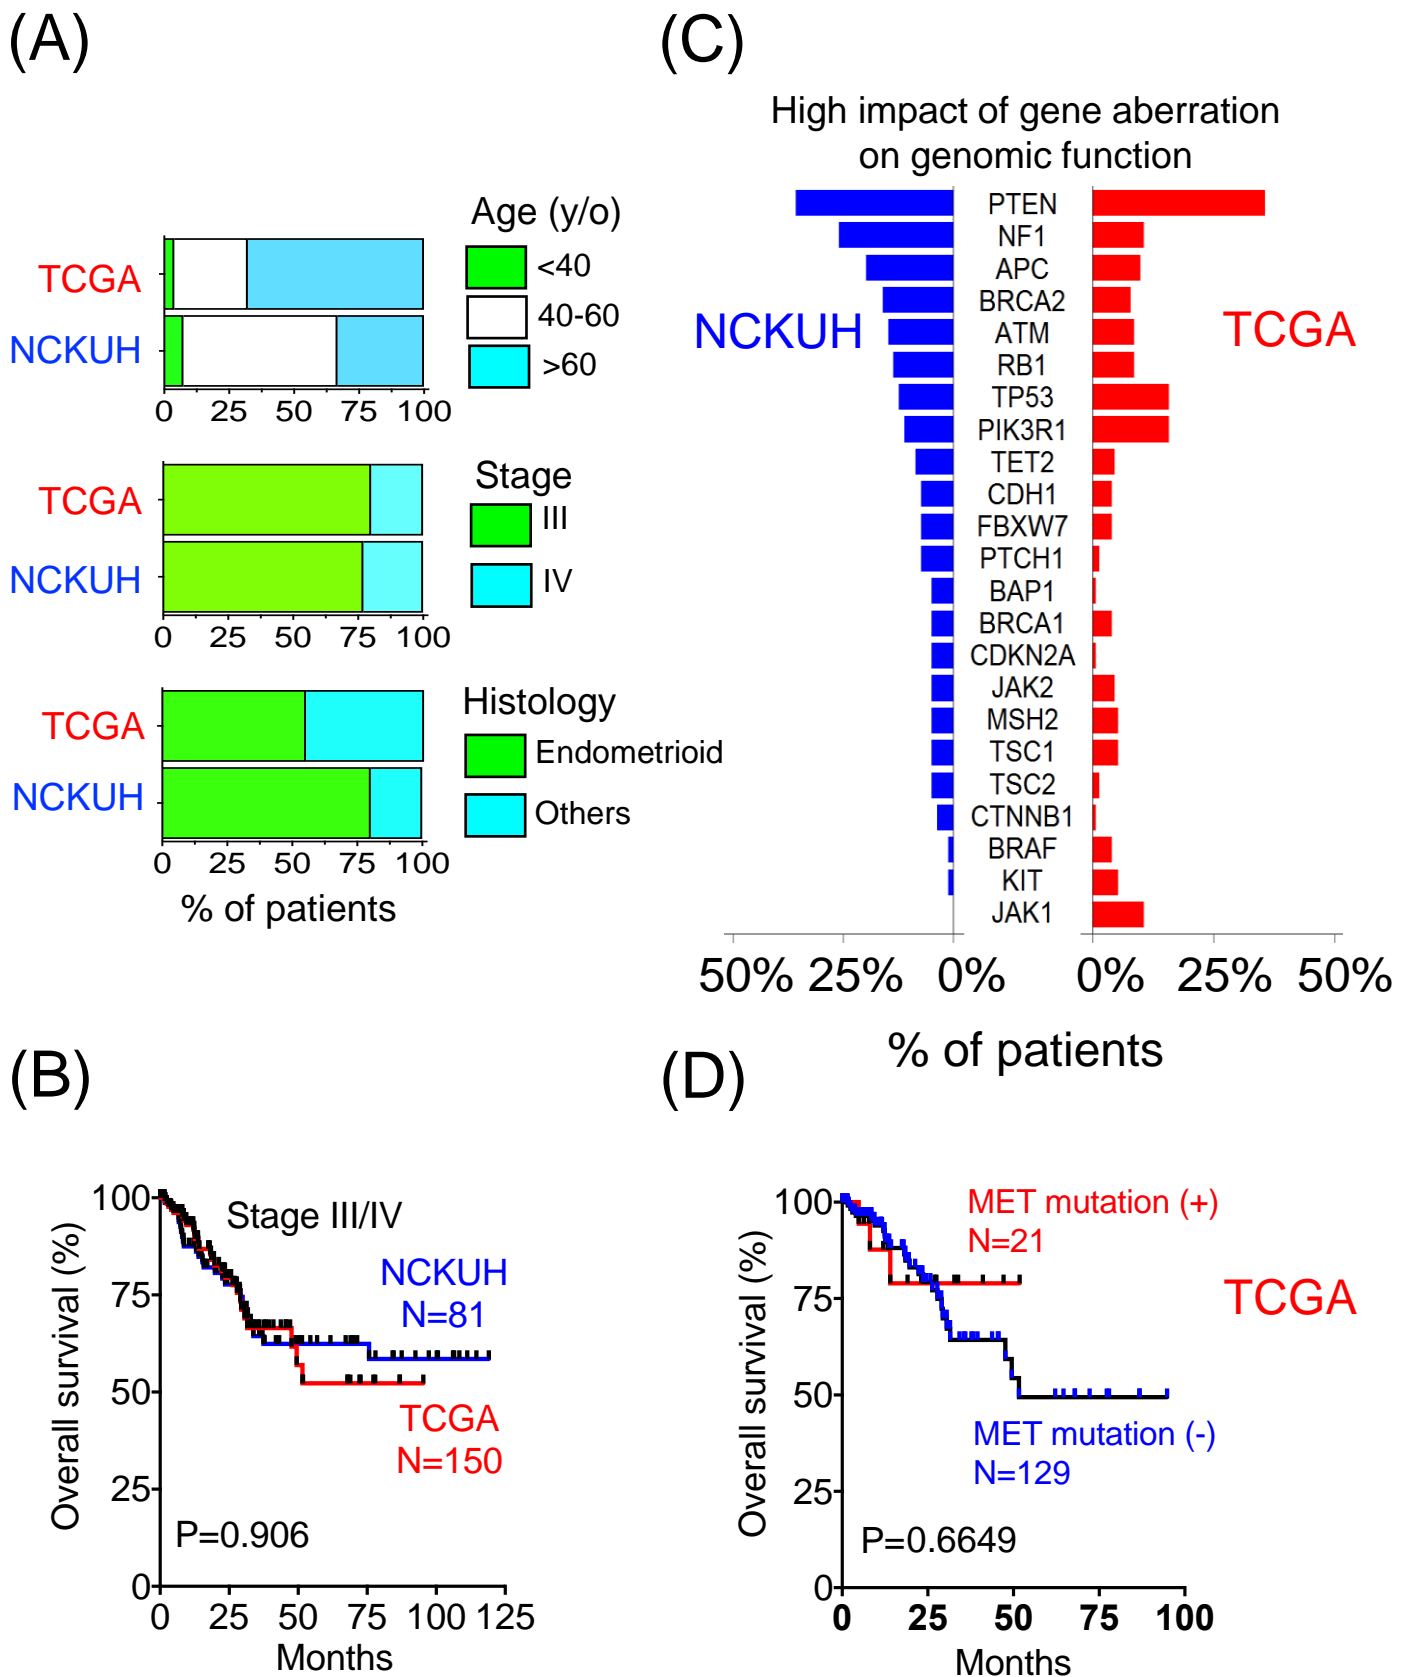

**Supplemental Figure S6. Comparison between TCGA and NCKUH cohort.**

**(A)** Distribution of ages at initial diagnosis, FIGO stages, histologic subtypes in TCGA and NCKUH cohort. **(B)** The clinical outcome of TCGA and NCKUH cohort. There was no significant difference in these parameters between two cohorts. **(C)** High impact of gene aberration on genomic function. Top 23 genes with high impact of genomic alterations were listed in each cohort. **(D)** The overall survival rate was not affected by *MET* mutations in TCGA cohort.
