# Supplementary material for: MET Mutation Is a Potential Therapeutic Target for Advanced Endometrial Cancer
Source: MDPI journal article supplement (doi:10.3390/cancers13164231), 2021-08-23
Supplement: s1 [file s1]

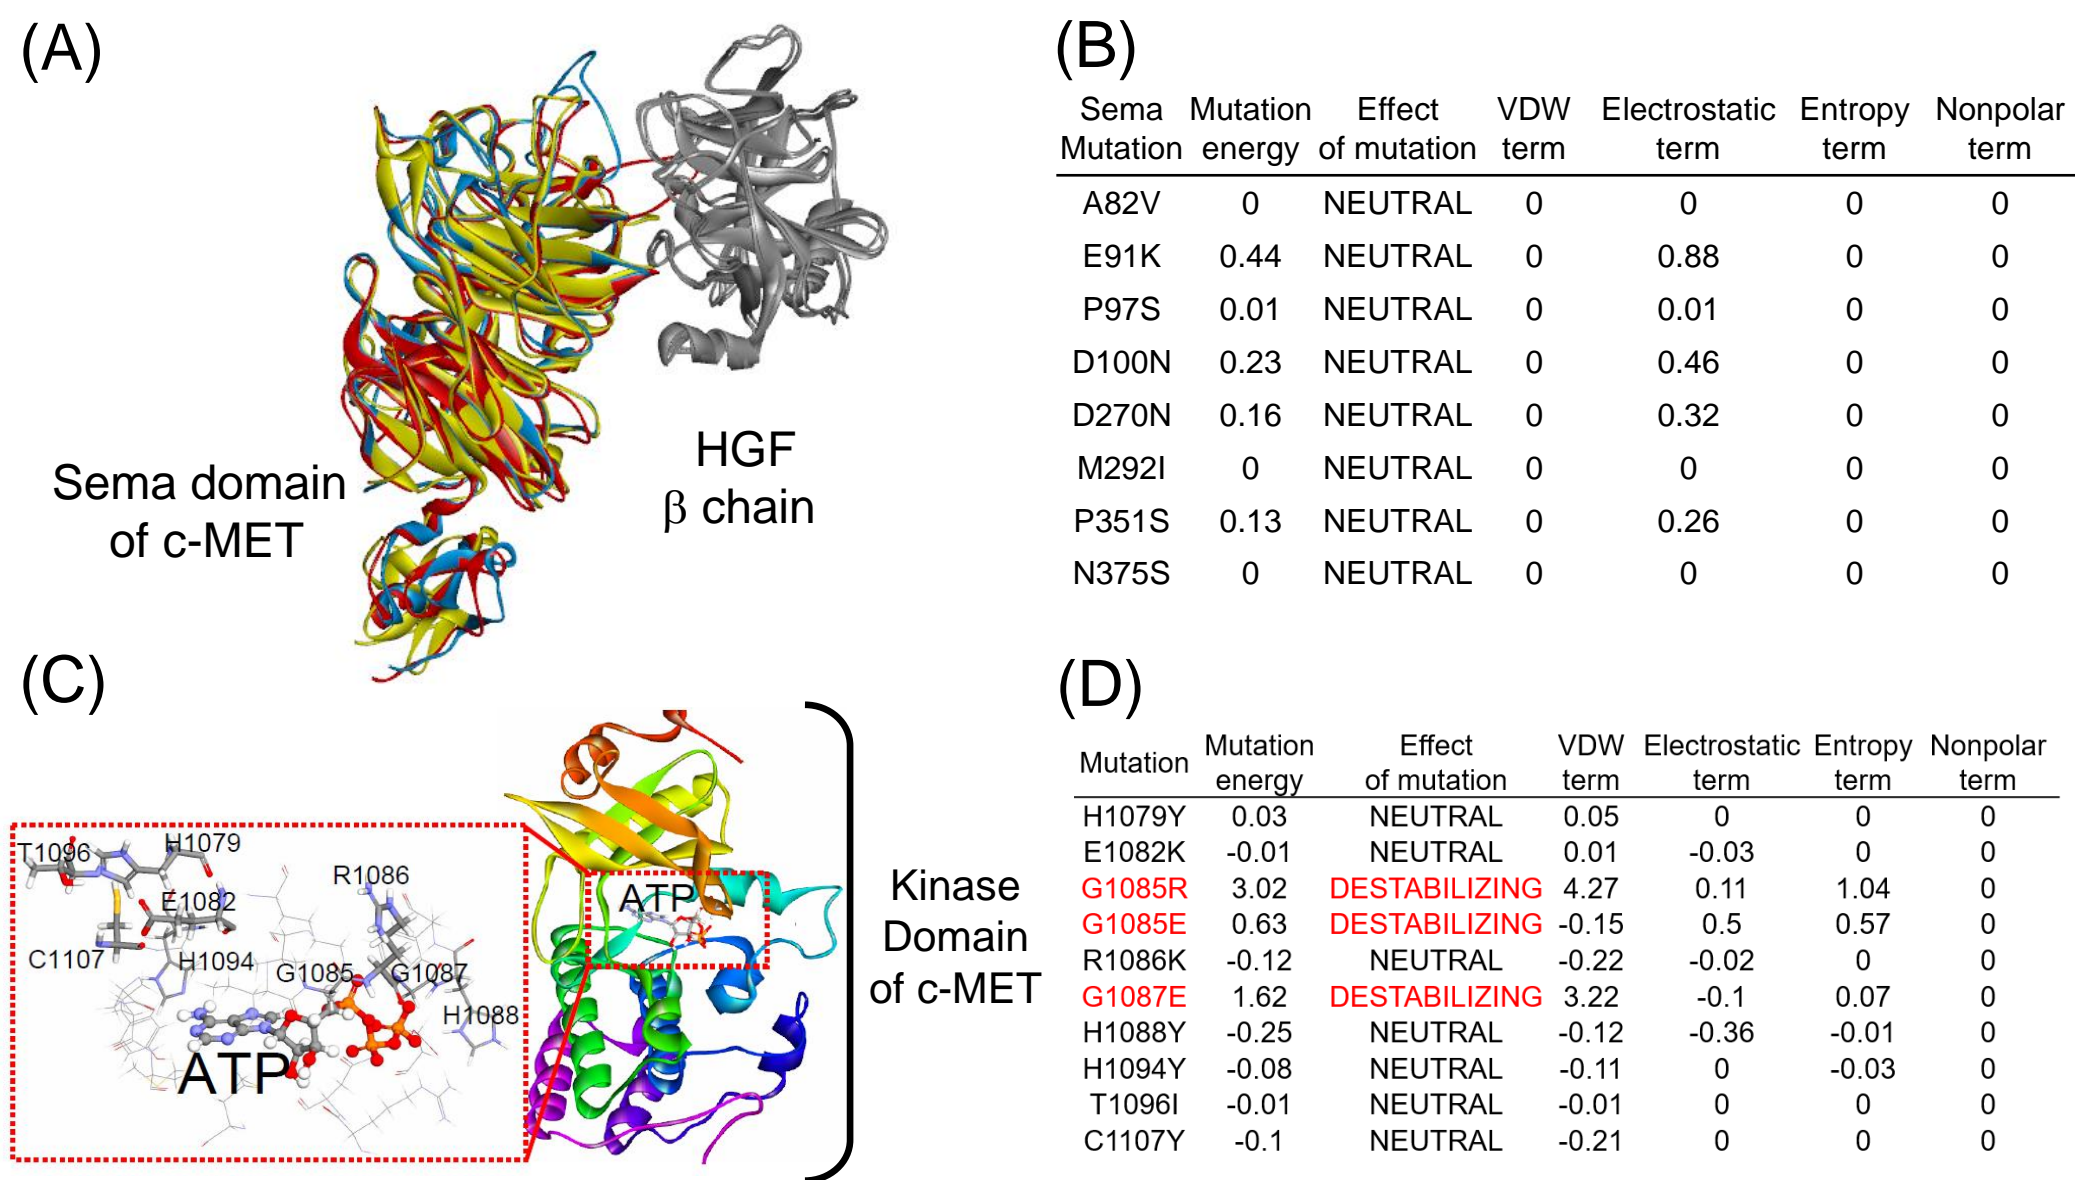

**Supplementary Figure S3. The potential effects of *MET* mutations on protein structure. (A) & (B) *In silico* analysis was to study the interaction between the semaphorin domain of c-MET and HGF. (C) & (D) The free energy changes were studied in the presence of ATP for the 10 *MET* mutations located in the kinase domain.**
