# Supplementary material for: MET Mutation Is a Potential Therapeutic Target for Advanced Endometrial Cancer
Source: MDPI journal article supplement (doi:10.3390/cancers13164231), 2021-08-23
Supplement: s1 [file s1]

**Table S3.** The clinical characteristics of patients with and without *MET* mutation.

|                        | Patients with <i>MET</i> mutation<br>(N=24) | Patients without <i>MET</i> mutation<br>(N=57) | <i>P</i> value |
|------------------------|---------------------------------------------|------------------------------------------------|----------------|
| Age (years)            |                                             |                                                |                |
| Mean (SD)              | 55.6 (10.8)                                 | 55.3 (10.4)                                    | 0.904          |
| FIGO staging - no. (%) |                                             |                                                | 0.283          |
| Stage III              | 16 (66.7)                                   | 46 (80.7)                                      |                |
| Stage IV               | 8 (33.3)                                    | 11 (19.3)                                      |                |
| Histology              |                                             |                                                | 0.883          |
| Endometrioid           | 20 (83.3 %)                                 | 45 (78.9 %)                                    |                |
| Others                 | 4 (16.7 %)                                  | 12 (21.1 %)                                    |                |
| Grading                |                                             |                                                | 0.848          |
| 1                      | 3 (12.5 %)                                  | 10 (17.5 %)                                    |                |
| 2                      | 11 (45.8 %)                                 | 24 (42.1 %)                                    |                |
| 3                      | 10 (41.7 %)                                 | 23 (40.4 %)                                    |                |
| Treatment - no. (%)    |                                             |                                                | >0.999         |
| Staging surgery        | 23 (95.8)                                   | 55 (96.5)                                      |                |
| Others                 | 1 (4.2)                                     | 2 (3.5)                                        |                |
| Chemotherapy - no. (%) |                                             |                                                | >0.999         |
| Yes                    | 24 (100)                                    | 56 (98.2)                                      |                |
| No                     | 0 (0)                                       | 1 (1.8)                                        |                |

SD, standard deviation.
