# Supplementary material for: MET Mutation Is a Potential Therapeutic Target for Advanced Endometrial Cancer
Source: MDPI journal article supplement (doi:10.3390/cancers13164231), 2021-08-23
Supplement: s1 [file s1]

**Table S2.** Patient characteristics.

| Characteristics     | No evidence of disease (N=47) | Progressive disease or death (N=34) | P       |
|---------------------|-------------------------------|-------------------------------------|---------|
| Age (years)         |                               |                                     |         |
| Mean (range)        | 53.2 (34 ~ 76)                | 58.4 (34 ~ 87)                      | 0.025   |
| FIGO staging        |                               |                                     | < 0.001 |
| Stage III           | 44 (93.6 %)                   | 18 (52.9 %)                         |         |
| Stage IV            | 3 (6.4 %)                     | 16 (47.1 %)                         |         |
| Histology           |                               |                                     | 0.115   |
| Endometrioid        | 41 (87.2 %)                   | 24 (70.6 %)                         |         |
| Others              | 6 (12.8 %)                    | 10 (29.4 %)                         |         |
| Grading*            |                               |                                     | 0.048   |
| 1                   | 10 (21.3 %)                   | 3 (8.8 %)                           |         |
| 2                   | 23 (48.9 %)                   | 12 (35.3 %)                         |         |
| 3                   | 14 (29.8 %)                   | 19 (55.9 %)                         |         |
| Survival (months)   |                               |                                     |         |
| PFS                 | 54.0 (1.7 ~ 119.1)            | 18.4 (1.7 ~ 75.7)                   | < 0.001 |
| OS                  | 54.0 (1.7 ~ 119.1)            | 27.3 (1.7 ~ 92.5)                   |         |
| Treatment           |                               |                                     | 0.139   |
| Staging surgery     | 47 (100 %)                    | 31 (91.2 %)                         |         |
| Others <sup>#</sup> | 0 (0 %)                       | 3 (8.8 %)                           |         |
| Chemotherapy**      |                               |                                     | > 0.999 |
| No                  | 1 (2.1 %)                     | 0 (0 %)                             |         |
| Yes                 | 46 (97.9 %)                   | 34 (100 %)                          |         |

\*: clear cell carcinoma, serous carcinoma, carcinosarcoma and mixed type carcinoma were classified as grade 3; #: dilation & curettage for diagnosis alone; PFS: progression-free survival; OS: overall survival. \*\*: chemotherapy: 8 cases (9.8%) received the regimen of paclitaxel plus platinum; 72 cases (88.9%) received the combination of paclitaxel, doxorubicin and platinum.

**Commented [M1]:** Please confirm the red color is necessary, if yes, please define
