# Supplementary material for: MET Mutation Is a Potential Therapeutic Target for Advanced Endometrial Cancer
Source: MDPI journal article supplement (doi:10.3390/cancers13164231), 2021-08-23

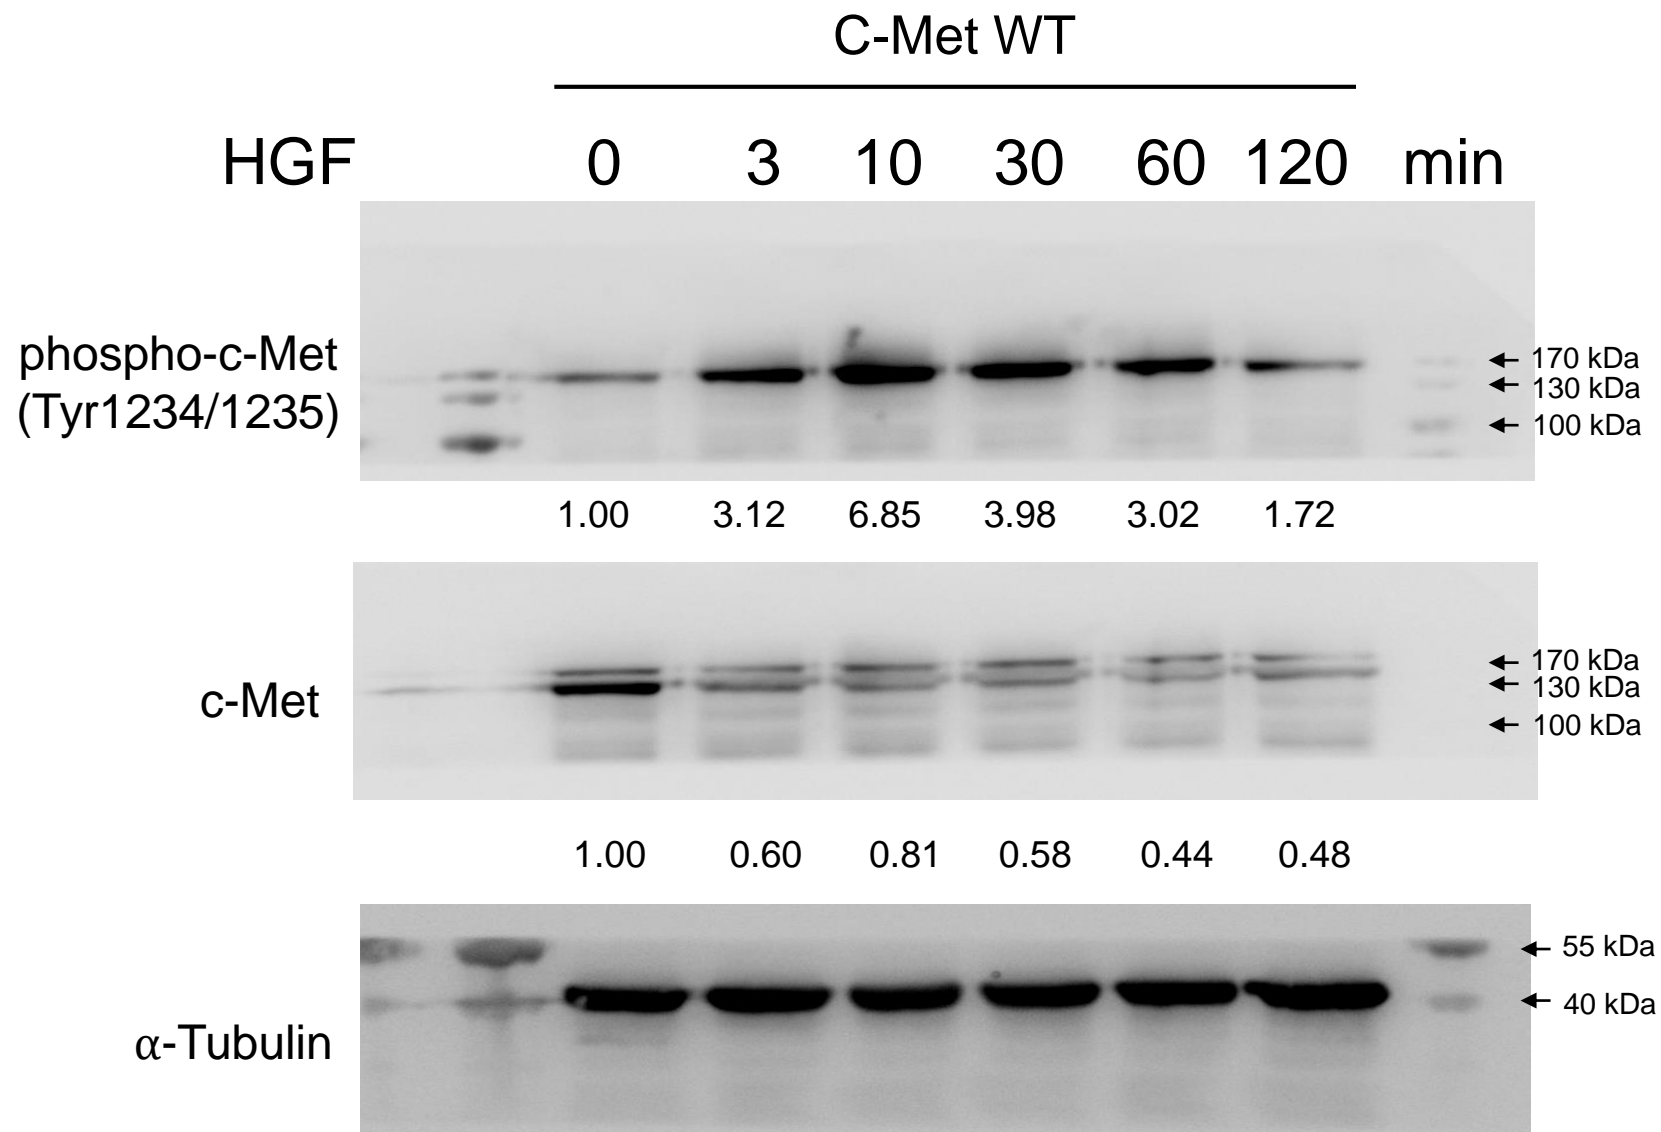

C-Met mutation  
Exon 2 (N375S)

HGF

0 3 10 30 60 120 min

phospho-c-Met  
(Tyr1234/1235)

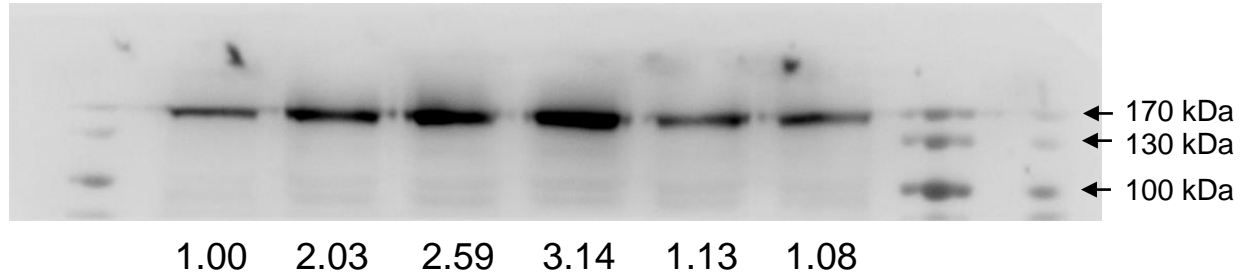

c-Met

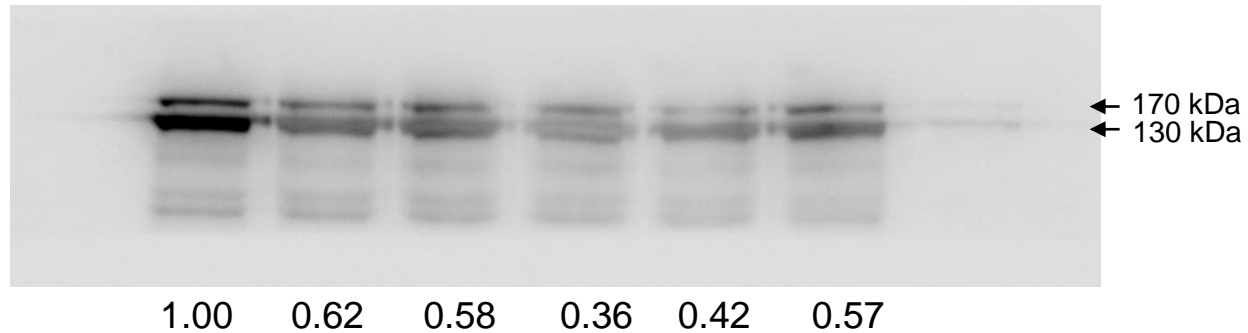

$\alpha$ -Tubulin

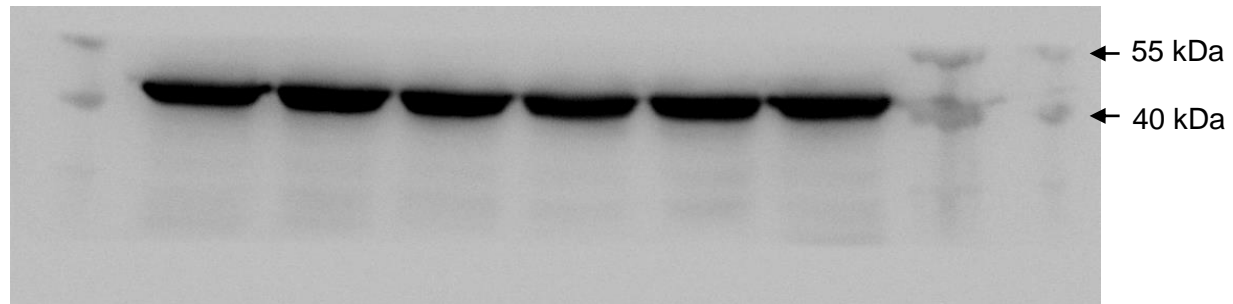

C-Met mutation  
Exon 15 (G1085R)

HGF

0 3 10 30 60 120 min

phospho-c-Met  
(Tyr1234/1235)

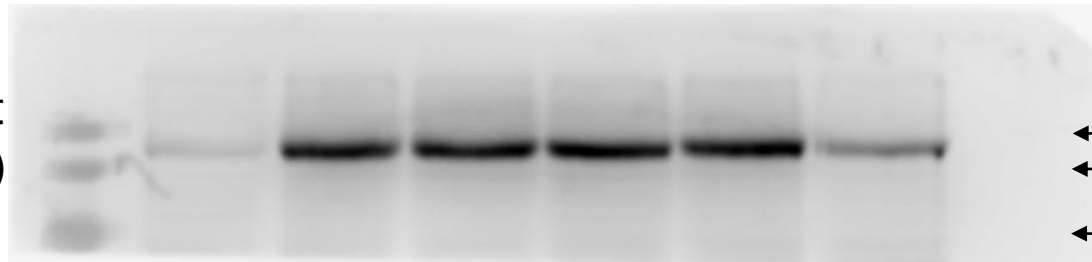

1.00 8.60 9.58 9.64 9.38 5.29

c-Met

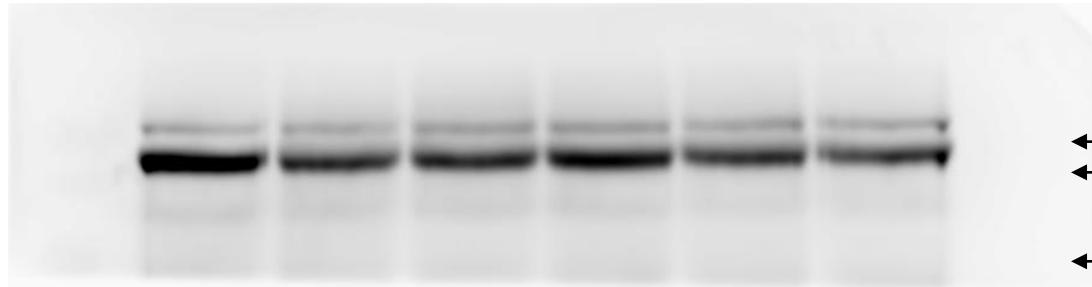

1.00 0.95 1.08 1.13 1.03 0.79

$\alpha$ -Tubulin

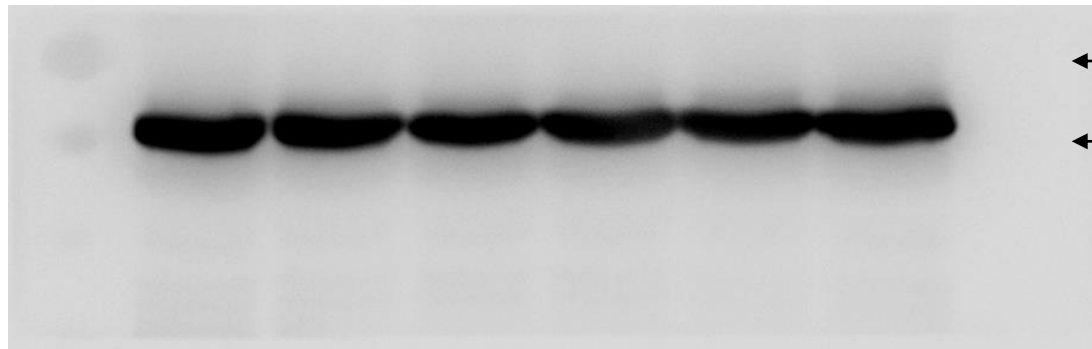

← 170 kDa  
← 130 kDa  
← 100 kDa

← 170 kDa  
← 130 kDa  
← 100 kDa

← 55 kDa  
← 40 kDa

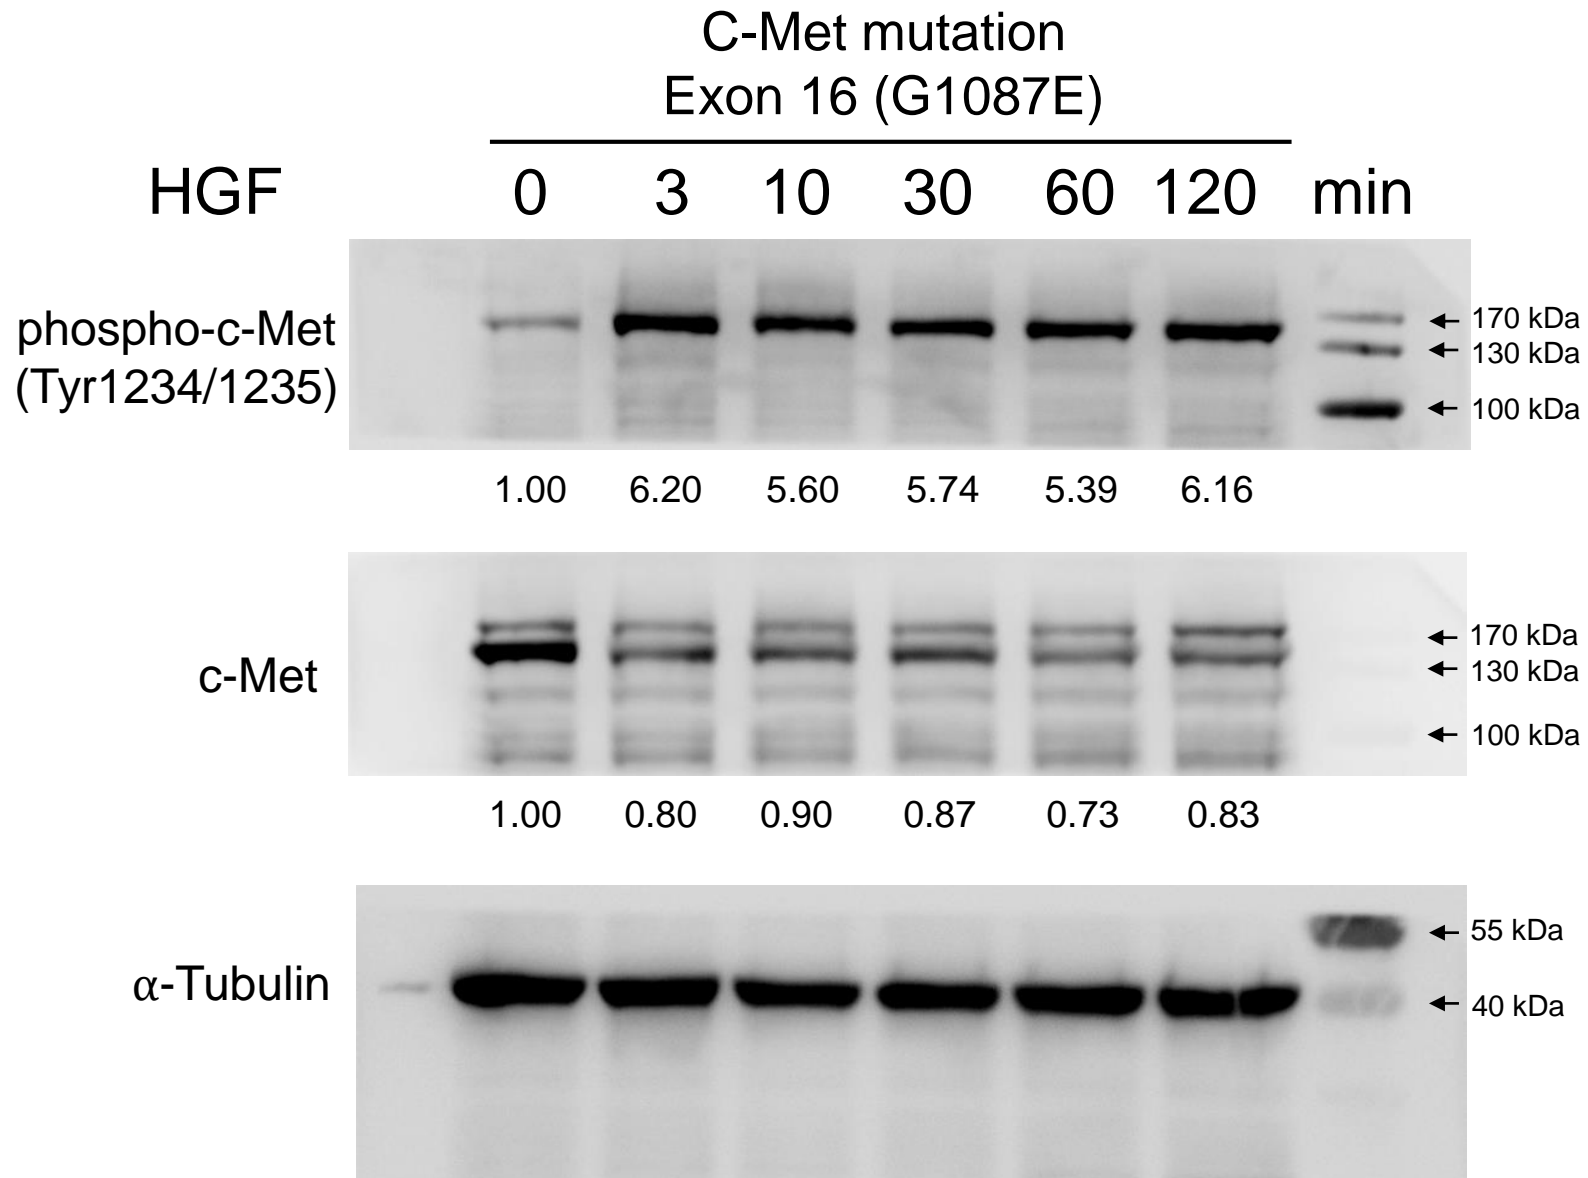

Supplement: s1 [file s1]
