# Supplementary material for: MET Mutation Is a Potential Therapeutic Target for Advanced Endometrial Cancer
Source: MDPI journal article supplement (doi:10.3390/cancers13164231), 2021-08-23
Supplement: s1 [file s1]

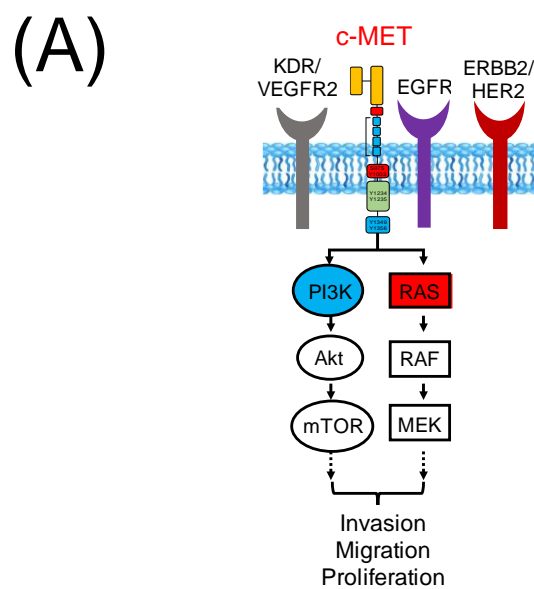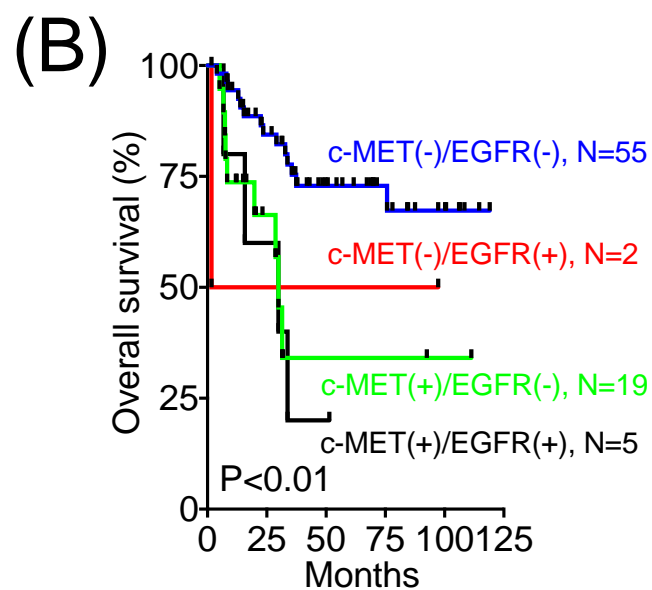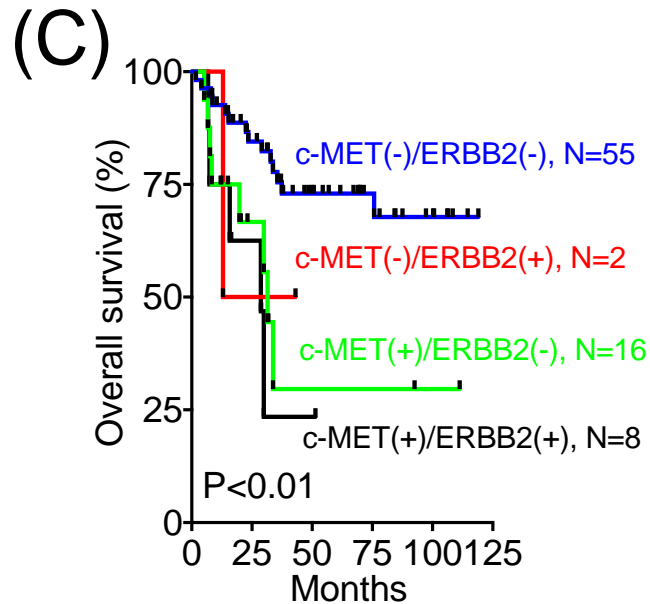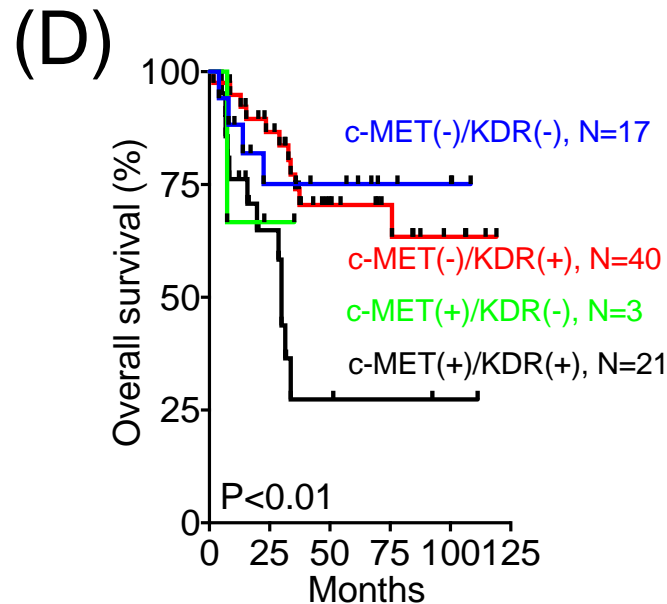

**Supplementary Figure S1. Impact of *MET* mutation and concurrent genetic mutations on clinical outcome of advanced endometrial cancer. (A)** Crosstalk between c-MET and other membrane receptors activated important downstream signaling. **(B~D)** Kaplan-Meier curves for overall survival were analyzed among *MET* wild type and *MET* mutant patients with or without concurrent *EGFR* **(B)**, *ERBB2* **(C)**, or *KDR* **(D)**.
